# Supplementary material
Source: PubMed Central journal article supplement (PMC3351286)
Supplement: supp_M111.334466_jbc.M111.334466-1.pdf [file supp_M111.334466_jbc.M111.334466-1.pdf]

Fig. S1

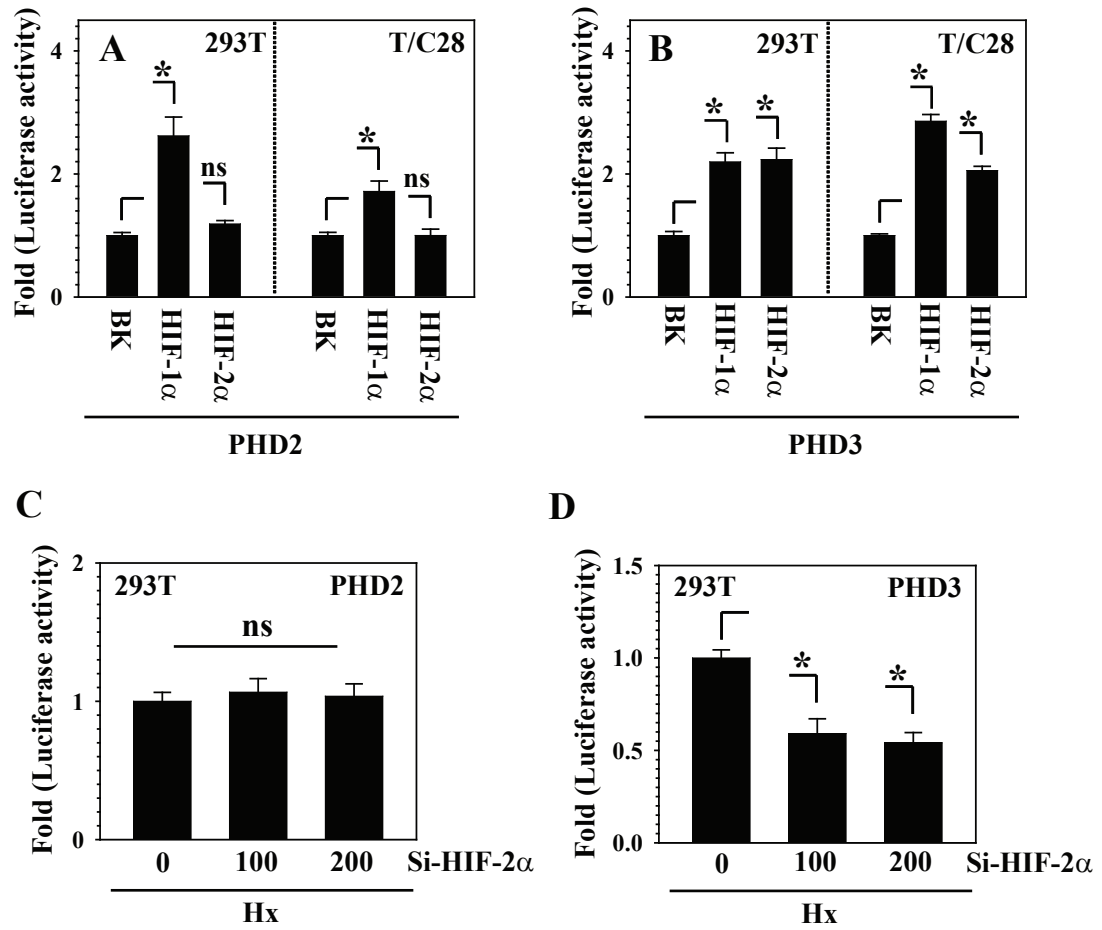

### Supplementary Figure legends

**Fig. S1.** Involvement of HIF- $\alpha$  in regulating PHD2 and PHD3 promoter activity in 293T cells and T/C28 chondrocytes. (A) Overexpression of HIF-1 $\alpha$  but not HIF-2 $\alpha$  significantly induced the activity of PHD2 reporter in both 293T cells and T/C28 cells. (B) Overexpression of HIF-1 $\alpha$  and HIF-2 $\alpha$  significantly induced the activity of PHD3 reporter in both the cell types. (C) PHD2 reporter activity is not significantly affected by siRNA mediated silencing of HIF-2 $\alpha$  in 293T cells under hypoxia. (D) PHD3 reporter activity is significantly suppressed by siRNA HIF-2 $\alpha$  in 293T cells under hypoxia. Data is represented as mean  $\pm$  SE of three independent experiments performed in triplicate (n=3); \* $p$ < 0.05; ns, not significant.
